# Supplementary material for: Metal nuclearity affects network connectivity: a series of highly connected metal–organic frameworks based on polynuclear metal clusters as secondary building units
Source: Royal Society of Chemistry journal article supplement (doi:10.1039/c6ce01287f), 2016-01-01
Supplement: c6ce01287f1.pdf [file c6ce01287f1.pdf]

## Supporting Information

### **Metal nuclearity affects network connectivity: a series of highly connected metal-organic frameworks based on polynuclear metal clusters as secondary building units**

**Yu-Ci Xu,<sup>a</sup> Yu Chen,<sup>a</sup> Hai-Jiang Qiu,<sup>a</sup> Xiao-Shan Zeng,<sup>a</sup> Hui-Ling Xu,<sup>a</sup> Jie Li,<sup>a</sup> Yong-Fei Zeng<sup>\*c</sup> and Dong-Rong Xiao<sup>\*ab</sup>**

*<sup>a</sup> College of Chemistry and Chemical Engineering, Southwest University, Chongqing, 400715, PR China*

*<sup>b</sup> State Key Laboratory of Structural Chemistry, Fujian Institute of Research on the Structure of Matter, Chinese Academy of Sciences, Fuzhou, Fujian 350002, PR China*

*<sup>c</sup> Key Laboratory of Inorganic–Organic Hybrid Functional Material Chemistry (Ministry of Education), Tianjin Key Laboratory of Structure and Performance for Functional Molecules, College of Chemistry, Tianjin Normal University, Tianjin, 300387, P. R. China*

### **Luminescent properties**

The solid state photoluminescence spectra of compounds **3–5** with d<sup>10</sup> metal center and free ligand H<sub>4</sub>aobtc (conjugated  $\pi$  system) were employed at room temperature under the same conditions (Fig. S7 and S8). The free ligand H<sub>4</sub>aobtc displays emissions at 475 and 528 nm upon excitation at 360 nm. The photoluminescence spectra of compounds **3–5** are similar to H<sub>4</sub>aobtc and emission maxima are 474 and 528 nm for **3**, 475 and 527 nm for **4**, 475 and 528 nm for **5** upon excitation at 360 nm, respectively. The emissions of compounds **3–5** may be assigned to intraligand transitions of H<sub>4</sub>aobtc, because the corresponding ligand also shows similar emission.

**Table S1** Selected bond lengths (Å) and angles (°) for compounds 1-7.

| Compound 1             |            |                     |            |
|------------------------|------------|---------------------|------------|
| Co(1)-O(1)             | 2.0284(19) | Co(3)-O(3)#6        | 2.214(2)   |
| Co(1)-O(8)#1           | 2.1091(19) | Co(3)-O(4)#6        | 2.082(2)   |
| Co(1)-O(11) #2         | 2.069(2)   | Co(3)-O(5)#4        | 2.031(2)   |
| Co(1)-O(14)#3          | 2.2360(19) | Co(3)-O(8)#5        | 2.1470(19) |
| Co(1)-Ow1              | 2.1898(18) | Co(3)-O(14)         | 2.1409(19) |
| Co(1)-N(4)             | 2.155(2)   | Co(3)-O(16)         | 2.0002(18) |
| Co(2)-O(6)#4           | 2.106(2)   | Co(4)-Ow2#7         | 2.133(3)   |
| Co(2)-O(7)             | 2.052(2)   | Co(4)-Ow2           | 2.128(3)   |
| Co(2)-O(13)            | 2.0943(18) | Co(4)-Ow3#7         | 2.056(2)   |
| Co(2)-Ow1              | 2.2055(17) | Co(4)-Ow3           | 2.056(2)   |
| Co(2)-O(16)#5          | 2.1231(19) | Co(4)-N(5)#7        | 2.202(2)   |
| Co(2)-O(16)            | 2.0296(19) | Co(4)-N(5)          | 2.201(2)   |
| O(1)-Co(1)-O(8)#2      | 170.29(8)  | O(4)#6-Co(3)-O(3)#6 | 61.12(8)   |
| O(1)-Co(1)-O(11) #3    | 95.25(8)   | O(4)#6-Co(3)-O(8)#5 | 83.89(8)   |
| O(1)-Co(1)-O(14)#1     | 91.16(8)   | O(4)#6-Co(3)-O(14)  | 103.27(8)  |
| O(1)-Co(1)-Ow1         | 92.16(8)   | O(5)#4-Co(3)-O(3)#6 | 95.48(9)   |
| O(1)-Co(1)-N(4)        | 93.17(8)   | O(5)#4-Co(3)-O(4)#6 | 88.33(9)   |
| O(8)#2-Co(1)-O(14)#12  | 80.91(7)   | O(5)#4-Co(3)-O(8)#5 | 168.32(8)  |
| O(8)#2-Co(1)-Ow1       | 81.72(7)   | O(5)#4-Co(3)-O(14)  | 91.09(9)   |
| O(8)#2-Co(1)-N(4)      | 92.91(8)   | O(8)#5-Co(3)-O(3)#6 | 88.39(8)   |
| O(11) #3-Co(1)-O(8)#2  | 92.15(8)   | O(14)-Co(3)-O(3)#6  | 162.75(8)  |
| O(11) #3-Co(1)-O(14)#1 | 171.59(7)  | O(14)-Co(3)-O(8)#5  | 82.28(7)   |
| O(11) #3-Co(1)-OW(1)   | 88.64(8)   | O(16)-Co(3)-O(3)#6  | 96.96(8)   |
| O(11) #3-Co(1)-N(4)    | 91.52(9)   | O(16)-Co(3)-O(4)#6  | 157.92(8)  |
| Ow1-Co(1)-O(14)#1      | 85.66(7)   | O(16)-Co(3)-O(5)#4  | 96.94(8)   |
| N(4)-Co(1)-O(14)#1     | 93.57(8)   | O(16)-Co(3)-O(8)#5  | 93.51(7)   |
| N(4)-Co(1)-Ow1         | 174.63(8)  | O(16)-Co(3)-O(14)   | 98.07(7)   |
| O(6)#4-Co(2)-Ow2       | 85.64(7)   | Ow2-Co(4)-Ow2#7     | 180.00(5)  |
| O(6)#4-Co(2)-O(16) #5  | 171.24(7)  | Ow2#7-Co(4)-N(5)    | 87.28(10)  |
| O(7)-Co(2)-O(6)#       | 94.06(9)   | Ow2-Co(4)-N(5)#7    | 87.28(10)  |

|                       |           |                     |            |
|-----------------------|-----------|---------------------|------------|
| O(7) #1-Co(2)-O(13)#4 | 87.75(8)  | Ow2-Co(4)-N(5)      | 92.72(10)  |
| O(7) #1-Co(2)-Ow2     | 87.59 (7) | Ow2#7-Co(4)-N(5) #7 | 92.72(10)  |
| O(7) -Co(2)-O(16) #5  | 87.30(8)  | Ow3#7-Co(4)-Ow2     | 92.25(11)  |
| O(13)-Co(2)-O(6)#4    | 86.61(8)  | Ow3-Co(4)-Ow2       | 87.75(11)  |
| O(13)-Co(2)-Ow2       | 170.65(8) | Ow3#7-Co(4)-Ow2#7   | 87.75(11)  |
| O(13)-Co(2)-O(16) #5  | 84.80(8)  | Ow3-Co(4)-Ow2#7     | 92.25(11)  |
| O(16)-Co(2)-O(6)#4    | 96.93(8)  | Ow3-Co(4)-Ow3       | 180.00(11) |
| O(16)-Co(2)-O(7)      | 169.00(8) | Ow3-Co(4)-N(5)      | 90.70(10)  |
| O(16)-Co(2)-O(13)     | 92.98(8)  | Ow3#8-Co(4)-N(5)#7  | 89.30(10)  |
| O(16)#5-Co(2)-Ow2     | 103.07(7) | Ow3#7-Co(4)-N(5)    | 89.30(10)  |
| O(16)-Co(2)-Ow2       | 93.14(7)  | Ow3#7-Co(4)-N(5)#7  | 90.70(10)  |
| O(16)#5-Co(2)-O(16)   | 81.85(9)  | N(5)#8-Co(4)-N(5)   | 180.0      |

Compound 2

|                       |            |                       |            |
|-----------------------|------------|-----------------------|------------|
| Ni(1)-O(2)#1          | 2.092(2)   | Ni(3)-O(1)#1          | 2.079(2)   |
| Ni(1)-O(2)#2          | 2.092(2)   | Ni(3)-O(4)#3          | 2.036(2)   |
| Ni(1)-O(3)            | 2.167(2)   | Ni(3)-O(6)            | 1.998(2)   |
| Ni(1)-O(3)#3          | 2.167(2)   | Ni(3)-O(8)            | 2.093(2)   |
| Ni(1)-O(6)#3          | 2.040(2)   | Ni(3)-O(9)#4          | 2.075(2)   |
| Ni(1)-O(6)            | 2.040(2)   | Ni(3)-N(1)            | 2.085(3)   |
| Ni(2)-O(6)#3          | 2.029(2)   | Ni(4)-Ow2             | 2.064(3)   |
| Ni(2)-O(6)            | 2.029(2)   | Ni(4)-Ow3             | 2.051(2)   |
| Ni(2)-O(7)#3          | 2.024(2)   | Ni(4)-Ow3#5           | 2.051(2)   |
| Ni(2)-O(7)            | 2.024(2)   | Ni(4)-Ow4             | 2.113(4)   |
| Ni(2)-Ow1#3           | 2.136(3)   | Ni(4)-N(2)            | 2.085(2)   |
| Ni(2)-Ow1             | 2.136(3)   | Ni(4)-N(2)#5          | 2.085(2)   |
| O(2)#1 -Ni(1) -O(2)#2 | 165.65(13) | O(1)#1 -Ni(3) -O(8)   | 87.93(10)  |
| O(2)#1 -Ni(1) -O(3)   | 84.26(8)   | O(1)#1 -Ni(3) -N(1)   | 88.10(10)  |
| O(2)#2 -Ni(1) -O(3)   | 86.29(9)   | O(4)#3 -Ni(3) -O(1)#1 | 88.84(11)  |
| O(2)#2 -Ni(1) -O(3)#3 | 84.26(9)   | O(4)#3 -Ni(3) -O(8)   | 175.63(10) |
| O(2)#1 -Ni(1) -O(3)#3 | 86.29(9)   | O(4)#3 -Ni(3) -O(9)#4 | 92.53(12)  |

|                        |            |                       |            |
|------------------------|------------|-----------------------|------------|
| O(3)#3 -Ni(1) -O(3)    | 97.50(11)  | O(4)#3 -Ni(3) -N(1)   | 86.41(9)   |
| O(6)#3 -Ni(1) -O(2)#2  | 93.00(9)   | O(6) -Ni(3) -O(1)#1   | 93.69(9)   |
| O(6)#3 -Ni(1) -O(2)#1  | 97.85(9)   | O(6) -Ni(3) -O(4)#3   | 89.76(9)   |
| O(6) -Ni(1) -O(2)#1    | 93.00(9)   | O(6) -Ni(3) -O(8)     | 93.38(9)   |
| O(6) -Ni(1) -O(2)#2    | 97.85(9)   | O(6) -Ni(3) -O(9)#4   | 93.48(10)  |
| O(6) -Ni(1) -O(3)#3    | 90.50(8)   | O(6) -Ni(3) -N(1)     | 175.74(10) |
| O(6)#3 -Ni(1) -O(3)#3  | 171.35(9)  | O(9)#4 -Ni(3) -O(1)#1 | 172.71(10) |
| O(6)#3 -Ni(1) -O(3)    | 90.50(8)   | O(9)#4 -Ni(3) -O(8)   | 90.32(11)  |
| O(6) -Ni(1) -O(3)      | 171.34(9)  | O(9)#4 -Ni(3) -N(1)   | 84.84(10)  |
| O(6) -Ni(1) -O(6)#3    | 81.73(12)  | N(1) -Ni(3) -O(8)     | 90.54(9)   |
| O(6)#3 -Ni(2) -O(6)    | 82.25(12)  | Ow2 -Ni(4) -Ow4       | 180.0      |
| O(6)#3 -Ni(2) -Ow1     | 95.09(9)   | Ow2 -Ni(4) -N(2)      | 93.23(8)   |
| O(6) -Ni(2) -Ow1#3     | 95.09(9)   | Ow2 -Ni(4) -N(2)#5    | 93.23(8)   |
| O(6)#3 -Ni(2) -Ow1#3   | 85.84(10)  | Ow3#5 -Ni(4) -Ow2     | 90.01(8)   |
| O(6) -Ni(2) -Ow1       | 85.84(10)  | Ow3 -Ni(4) -Ow2       | 90.01(8)   |
| O(7) #3 -Ni(2) -O(6)   | 176.65(9)  | Ow3#5 -Ni(4) -Ow3     | 179.97(16) |
| O(7)#3 -Ni(2) -O(6) #3 | 95.92(9)   | Ow3 -Ni(4) -Ow4       | 89.99(8)   |
| O(7) -Ni(2) -O(6)#3    | 176.65(9)  | Ow3#5 -Ni(4) -Ow4     | 89.99(8)   |
| O(7) -Ni(2) -O(6)      | 95.92(9)   | Ow3 -Ni(4) -N(2)      | 85.32(10)  |
| O(7) -Ni(2) -O(7)#3    | 86.05(15)  | Ow3 -Ni(4) -N(2)#5    | 94.68(10)  |
| O(7) -Ni(2) -Ow1#3     | 91.55(11)  | Ow3#5 -Ni(4) -N(2)    | 94.68(10)  |
| O(7) -Ni(2) -Ow1       | 87.55(11)  | Ow3#5 -Ni(4) -N(2)#5  | 85.32(10)  |
| O(7)#3 -Ni(2) -Ow1#3   | 87.55(11)  | N(2) -Ni(4) -Ow4      | 86.77(8)   |
| O(7)#3 -Ni(2) -Ow1     | 91.55(11)  | N(2)#5 -Ni(4) -Ow4    | 86.77(8)   |
| Ow1 -Ni(2) -Ow1#3      | 178.77(15) | N(2) -Ni(4) -N(2)#5   | 173.55(16) |

**Compound 3**

|              |          |              |          |
|--------------|----------|--------------|----------|
| Zn(1)-O(1)   | 2.005(2) | Zn(2)-O(2)#4 | 2.010(2) |
| Zn(1)-O(4)#2 | 2.030(2) | Zn(2)-O(4)#2 | 2.222(2) |
| Zn(1)-O(5)#3 | 1.990(2) | Zn(2)-O(4)#5 | 2.222(2) |
| Zn(1)-O(7)#1 | 2.367(3) | Zn(2)-O(6)#6 | 2.079(2) |

|                     |            |                     |           |
|---------------------|------------|---------------------|-----------|
| Zn(1)-O(8)#1        | 2.037(3)   | Zn(2)-O(6)#3        | 2.079(2)  |
| Zn(2)-O(2)          | 2.010(2)   |                     |           |
| O(1)-Zn(1)-O(4)#2   | 114.34(10) | O(2)-Zn(2)-O(4)#5   | 88.35(9)  |
| O(1)-Zn(1)-O(7)#1   | 90.01(13)  | O(2)-Zn(2)-O(4)#2   | 88.42(10) |
| O(1)-Zn(1)-O(8)#1   | 105.87(11) | O(2)#4-Zn(2)-O(6)#6 | 96.17(10) |
| O(4)#2-Zn(1)-O(7)#1 | 90.84(10)  | O(2)#4-Zn(2)-O(6)#3 | 83.83(10) |
| O(4)#2-Zn(1)-O(8)#1 | 129.14(10) | O(2)-Zn(2)-O(6)#3   | 96.17(10) |
| O(5)#3-Zn(1)-O(1)   | 103.39(11) | O(2)-Zn(2)-O(6)#6   | 83.83(10) |
| O(5)#3-Zn(1)-O(4)#2 | 98.58(10)  | O(4)#2-Zn(2)-O(4)#5 | 180.0     |
| O(5)#3-Zn(1)-O(7)#1 | 158.51(12) | O(6)#6-Zn(2)-O(4)#5 | 87.84(9)  |
| O(5)#3-Zn(1)-O(8)#1 | 101.12(10) | O(6)#3-Zn(2)-O(4)#5 | 92.16(9)  |
| O(8)#1-Zn(1)-O(7)#1 | 58.55(10)  | O(6)#3-Zn(2)-O(4)#2 | 87.84(9)  |
| O(2)#4-Zn(2)-O(2)#4 | 180.0      | O(6)#6-Zn(2)-O(4)#2 | 92.16(9)  |
| O(2)#4-Zn(2)-O(4)#2 | 91.65(9)   | O(6)#6-Zn(2)-O(6)#3 | 180.0     |
| O(2)#4-Zn(2)-O(4)#5 | 88.35(9)   |                     |           |

Compound 4

|                     |            |                     |            |
|---------------------|------------|---------------------|------------|
| Zn(1)-O(1)          | 1.994(19)  | Zn(2)-O(2)#4        | 2.0539(19) |
| Zn(1)-O(3)#1        | 2.425(2)   | Zn(2)-O(5)#3        | 2.020(18)  |
| Zn(1)-O(4)#1        | 2.016(2)   | Zn(2)-O(5)#6        | 2.020(18)  |
| Zn(1)-O(6)#2        | 1.994(19)  | Zn(2)-O(8)#5        | 2.238(18)  |
| Zn(1)-O(8)#3        | 2.013(18)  | Zn(2)-O(8)#3        | 2.238(18)  |
| Zn(2)-O(2)          | 2.0534(17) |                     |            |
| O(1)-Zn(1)-O(3)#1   | 161.66(8)  | O(2)#4-Zn(2)-O(8)#2 | 91.58(7)   |
| O(1)-Zn(1)-O(4)#1   | 104.54(8)  | O(2)-Zn(2)-O(8)#2   | 88.42(7)   |
| O(1)-Zn(1)-O(8)#2   | 97.956(8)  | O(5)#3-Zn(2)-O(2)   | 96.05(8)   |
| O(4)#1-Zn(1)-O(3)#1 | 58.10(8)   | O(5)#6-Zn(2)-O(2)   | 83.95(8)   |
| O(6)#3-Zn(1)-O(1)   | 102.11(9)  | O(5)#3-Zn(2)-O(2)#4 | 83.95(8)   |
| O(6)#3-Zn(1)-O(3)#1 | 89.53(9)   | O(5)#6-Zn(2)-O(2)#4 | 96.05(8)   |
| O(6)#3-Zn(1)-O(4)#1 | 106.22(9)  | O(5)#6-Zn(2)-O(5)#3 | 180.0      |
| O(6)#3-Zn(1)-O(8)#2 | 118.89(8)  | O(5)#6-Zn(2)-O(8)#5 | 88.59(8)   |
| O(8)#2-Zn(1)-O(3)#1 | 88.51(9)   | O(5)#6-Zn(2)-O(8)#2 | 91.38(8)   |
| O(8)#2-Zn(1)-O(4)#1 | 123.32(8)  | O(5)#3-Zn(2)-O(8)#5 | 91.38(8)   |
| O(2)-Zn(2)-O(2)#4   | 180.0      | O(5)#3-Zn(2)-O(8)#2 | 88.62(8)   |

|                       |          |                       |           |
|-----------------------|----------|-----------------------|-----------|
| O(2)#4 -Zn(2) -O(8)#5 | 88.42(7) | O(8)#5 -Zn(2) -O(8)#2 | 180.00(8) |
| O(2) -Zn(2) -O(8)#5   | 91.58(7) |                       |           |

**Compound 5**

|                      |            |                      |           |
|----------------------|------------|----------------------|-----------|
| Cd(1)-O(1)           | 2.252(3)   | Cd(2)-O(2)#4         | 2.241(4)  |
| Cd(1)-O(4)#2         | 2.267(3)   | Cd(2)-O(4)#2         | 2.297(3)  |
| Cd(1)-O(5)#3         | 2.192(3)   | Cd(2)-O(4)#5         | 2.297(3)  |
| Cd(1)-O(7)#1         | 2.305(3)   | Cd(2)-O(6)#6         | 2.242(3)  |
| Cd(1)-O(8)#1         | 2.357(3)   | Cd(2)-O(6)#3         | 2.242(3)  |
| Cd(2)-O(2)           | 2.241(4)   |                      |           |
| O(1)-Cd(1)-O(4)#2    | 115.76(12) | O(2)-Cd(2)-O(4)#2    | 81.06(13) |
| O(1)-Cd(1)-O(7)#1    | 105.16(15) | O(2)-Cd(2)-O(4)#5    | 98.94(13) |
| O(1)-Cd(1)-O(8)#1    | 91.76(15)  | O(2)-Cd(2)-O(6)#3    | 92.33(15) |
| O(4)#2 -Cd(1)-O(7)#1 | 132.82(13) | O(2)-Cd(2)-O(6)#6    | 87.67(15) |
| O(4)#2 -Cd(1)-O(8)#1 | 98.06(13)  | O(2)#4 -Cd(2)-O(6)#3 | 87.67(15) |
| O(5)#3 -Cd(1)-O(1)   | 100.37(15) | O(2)#4 -Cd(2)-O(6)#6 | 92.33(15) |
| O(5)#3 -Cd(1)-O(4)#2 | 97.07(13)  | O(4)#2 -Cd(2)-O(4)#5 | 180.0     |
| O(5)#3 -Cd(1)-O(7)#1 | 97.69(12)  | O(6)#6 -Cd(2)-O(4)#5 | 89.06(12) |
| O(5)#3 -Cd(1)-O(8)#1 | 153.14(12) | O(6)#6 -Cd(2)-O(4)#2 | 90.94(12) |
| O(7)#1 -Cd(1)-O(8)#1 | 55.79(12)  | O(6)#3 -Cd(2)-O(4)#5 | 90.94(12) |
| O(2)-Cd(2)-O(2)#4    | 180.0      | O(6)#3 -Cd(2)-O(4)#2 | 89.06(12) |
| O(2)#4 -Cd(2)-O(4)#5 | 81.06(13)  | O(6)#6 -Cd(2)-O(6)#3 | 180.0     |
| O(2)#4 -Cd(2)-O(4)#2 | 98.94(13)  |                      |           |

**Compound 6**

|                      |            |                   |            |
|----------------------|------------|-------------------|------------|
| Co(1)-O(2) #2        | 1.994(2)   | Co(2)-O(1) #2     | 2.0605(19) |
| Co(1)-O(3)#6         | 2.345(2)   | Co(2)-O(6)#3      | 2.021(2)   |
| Co(1)-O(4) #6        | 2.032(2)   | Co(2)-O(6)        | 2.021(2)   |
| Co(1)-O(7)           | 2.017(2)   | Co(2)-O(8)#4      | 2.209(2)   |
| Co(1)-O(8)#5         | 2.034(2)   | Co(2)-O(8)#4      | 2.209(2)   |
| Co(2)-O(1) #1        | 2.0605(19) |                   |            |
| O(1) #2-Co(2)-O(1)#3 | 180        | O(6)-Co(2)-O(8)#4 | 91.49(8)   |

|                     |           |                     |            |
|---------------------|-----------|---------------------|------------|
| O(1)#2-Co(2)-O(8)#4 | 90.12(8)  | O(8)#4-Co(2)-O(8)#5 | 180.0      |
| O(1)#3-Co(2)-O(8)#4 | 89.88(12) | O(2)#2-Co(1)-O(3)#7 | 163.82(9)  |
| O(1)#3-Co(2)-O(8)#5 | 90.12(8)  | O(2)#2-Co(1)-O(4)#7 | 105.08(9)  |
| O(1)#2-Co(2)-O(8)#5 | 89.88(8)  | O(2)#2-Co(1)-O(7)   | 101.67(10) |
| O(6)#6-Co(2)-O(1)#2 | 84.48(9)  | O(2)#2-Co(1)-O(8)#5 | 98.74 (9)  |
| O(6)-Co(2)-O(1)#2   | 95.52(9)  | O(4)#7-Co(1)-O(3)#7 | 59.41(8)   |
| O(6)-Co(2)-O(1)#3   | 84.48(9)  | O(4)#7-Co(1)-O(8)#5 | 125.95(9)  |
| O(6)#6-Co(2)-O(1)#3 | 95.52(9)  | O(7)-Co(1)-O(3)#7   | 87.83(10)  |
| O(6)-Co(2)-O(6)#6   | 180.0     | O(7)-Co(1)-O(4)#7   | 105.08(10) |
| O(2)-Co(2)-O(8)#5   | 88.51(8)  | O(7)-Co(1)-O(8)#5   | 116.61(9)  |
| O(6)#6-Co(2)-O(8)#5 | 91.50(8)  | O(8)#5-Co(1)-O(3)#7 | 88.40(9)   |
| O(6)#6-Co(2)-O(8)#4 | 88.50(8)  |                     |            |

Compound 7

|                     |            |                     |            |
|---------------------|------------|---------------------|------------|
| Mn(1)-O(1)          | 2.132(2)   | Mn(2)-O(2)          | 2.131(2)   |
| Mn(1)-O(4)#2        | 2.1667(19) | Mn(2)-O(4)#2        | 2.2319(18) |
| Mn(1)-O(5)#1        | 2.193(2)   | Mn(2)-O(4)#5        | 2.1319(18) |
| Mn(1)-O(6)#1        | 2.266(2)   | Mn(2)-O(7)#6        | 2.1323(19) |
| Mn(1)-O(8)#3        | 2.076(2)   | Mn(2)-O(7)#3        | 2.1323(19) |
| Mn(2)-O(2)#4        | 2.131(2)   |                     |            |
| O(1)-Mn(1)-O(4)#2   | 118.56(9)  | O(2)#4-Mn(2)-O(4)#2 | 97.08(9)   |
| O(1)-Mn(1)-O(5)#1   | 103.39(10) | O(2)-Mn(2)-O(4)#5   | 97.08(9)   |
| O(1)-Mn(1)-O(6)#1   | 92.76(10)  | O(2)-Mn(2)-O(7)#6   | 86.69(9)   |
| O(4)#2-Mn(1)-O(5)#1 | 131.68(8)  | O(2)#4-Mn(2)-O(7)#3 | 86.69(9)   |
| O(4)#2-Mn(1)-O(6)#1 | 94.72(8)   | O(2)#4-Mn(2)-O(7)#6 | 93.31(9)   |
| O(5)#1-Mn(1)-O(6)#1 | 58.57(8)   | O(2)-Mn(2)-O(7)#3   | 93.31(9)   |
| O(8)#3-Mn(1)-O(1)   | 99.45(10)  | O(4)#2-Mn(2)-O(4)#5 | 180.0      |
| O(8)#3-Mn(1)-O(4)#2 | 95.03(8)   | O(7)#3-Mn(2)-O(4)#5 | 91.34(8)   |
| O(8)#3-Mn(1)-O(5)#1 | 100.93(8)  | O(7)#6-Mn(2)-O(4)#5 | 88.66(8)   |
| O(8)#3-Mn(1)-O(6)#1 | 158.34(9)  | O(7)#3-Mn(2)-O(4)#2 | 88.66(8)   |
| O(2)-Mn(2)-O(2)#4   | 180.0      | O(7)#6-Mn(2)-O(4)#2 | 91.34(8)   |

|                      |          |                      |       |
|----------------------|----------|----------------------|-------|
| O(2)#4 -Mn(2)-O(4)#5 | 82.92(9) | O(7)#6 -Mn(2)-O(7)#3 | 180.0 |
| O(2)-Mn(2)-O(4)#2    | 82.92(9) |                      |       |

<sup>a</sup> Symmetry transformations used to generate equivalent atoms: for **1**: #1 1-x,1-y,-z; #2 -1+x,+y,+z; #3 1+x,+y,1+z; #4 2-x,1-y,1-z; #5 1-x,1-y,1-z; #6 +x,-1+y,+z; #7 -x,1-y,-z; #8 x,-y,-1-z; for **2**: #1 1-x,1-y,-z; #2 1/2+x,+y,-z; #3 3/2-x,1-y,+z; #4 2-x,+y,1/2-z; #5 3/2-x,-y,+z; for **3**: #1 1+x,1+y,1+z; #2 1+x,+y,+z; #3 1+x,+y,1+z; #4 2-x,1-y,2-z; #5 1-x,1-y,1-z; #6 1-x,1-y,2-z; for **4**: #1 +x, 1+y,+z; #2 +x,+y,-1+z; #3 -1+x,+y,-1+z; #4 -x,-y,-1-z; #5 1-x,-y,-z; #6 -x,-y,-z; for **5**: #1 1+x,1+y,1+z; #2 -1+x,-1+y,-1+z; #3 -1+x,+y,+z; #4 -1+x,+y,-1+z; #5 -1-x,1-y,1-z; #6 -x,1-y,1-z; for **6**: #1 -1+x,-1+y,-1+z; #2 -1+x,+y,+z; #3 -1+x,+y,-1+z; #4 -1-x,1-y,-1-z; #5 -x,1-y,-1-z; #6 -x,1-y,-z; for **7**: #1 -1+x,-1+y,-1+z; #2 1+x,1+y,1+z; #3 1+x,+y,+z; #4 1+x,+y,1+z; #5 2-x,1-y,1-z; #6 1-x,1-y,1-z.

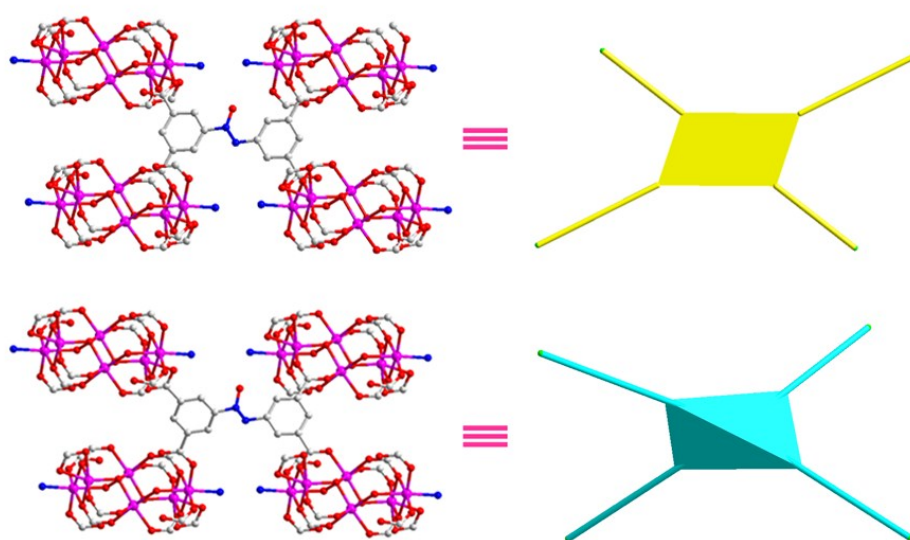

**Fig. S1** Two kinds of aobtc ligand are regarded as two kinds of 4-connected nodes in compound **1** (quadrilateral planar node in yellow and tetrahedral node in cyan).



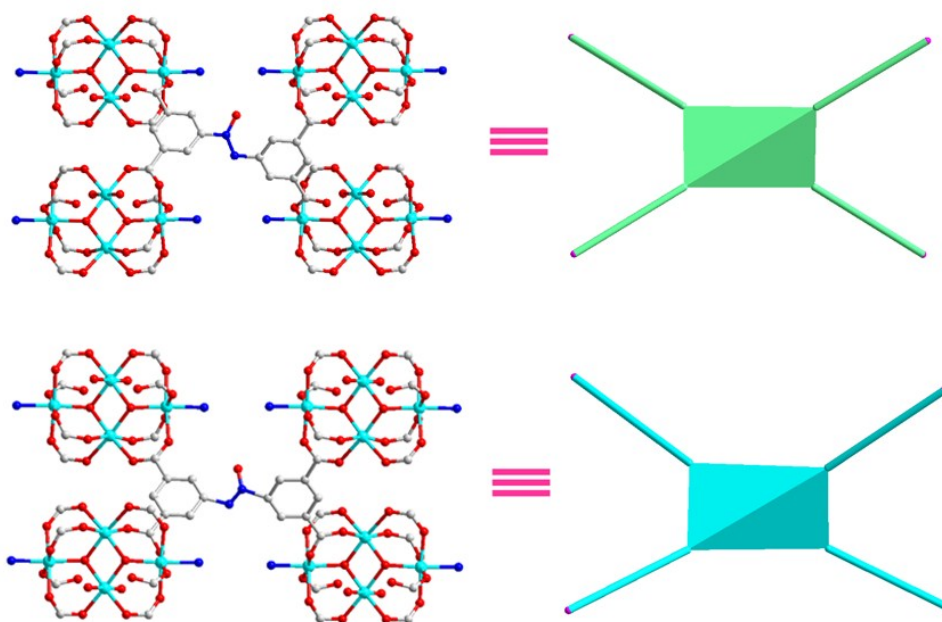

**Fig. S2** The two different tetrahedral nodes of aobtc ligand in compound 2.

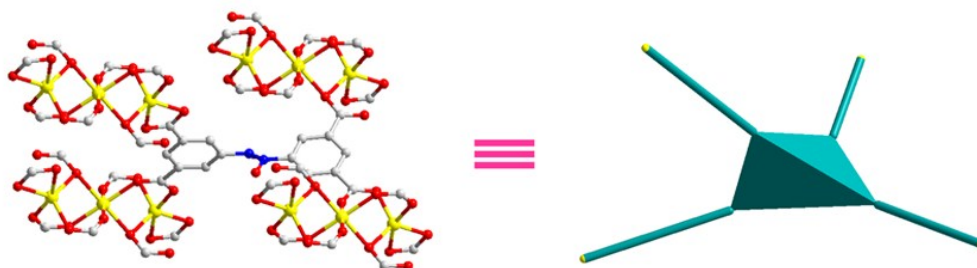

**Fig. S3** The tetrahedral node of aobtc ligand in compounds 3-7.

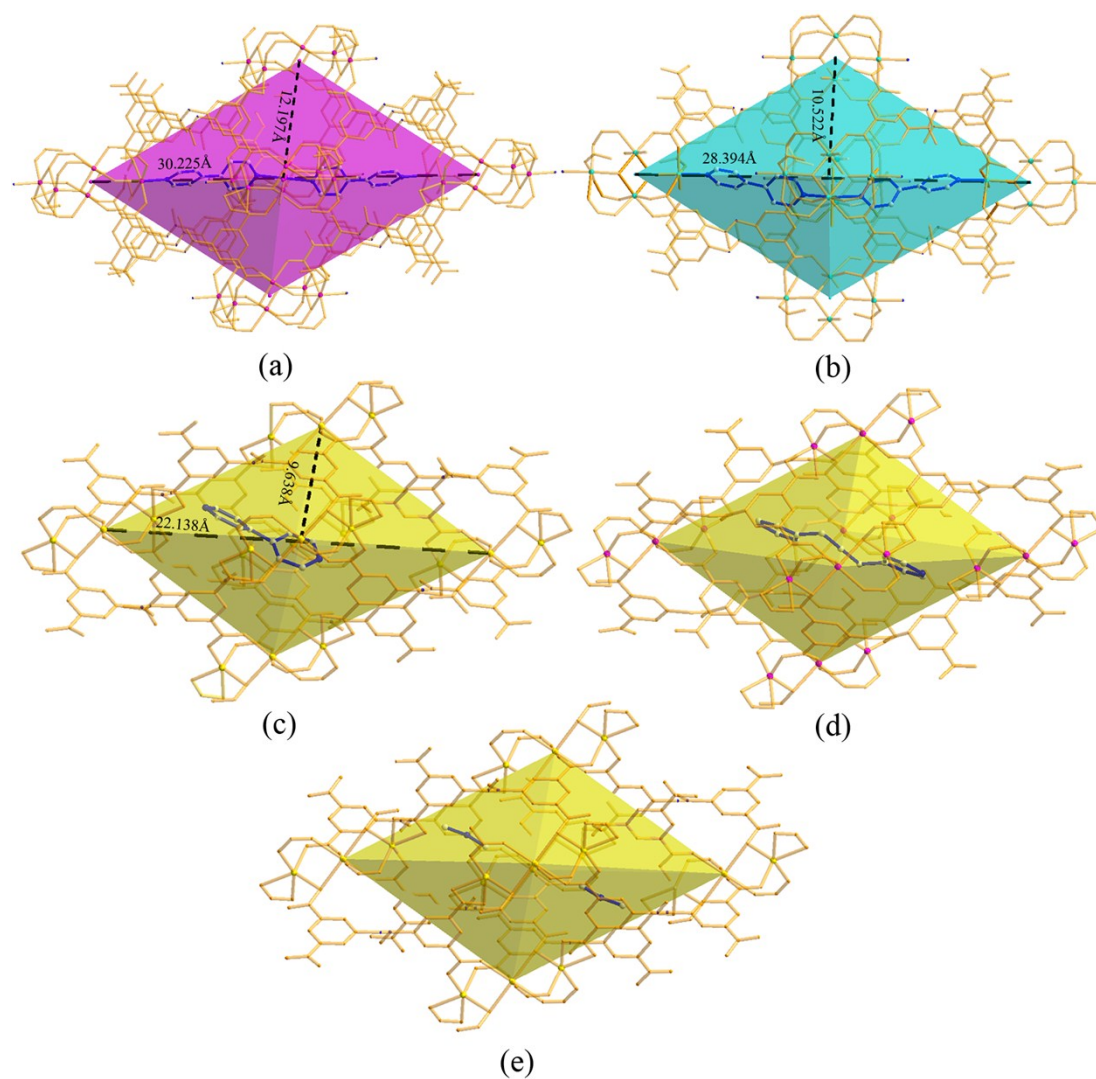

**Fig. S4** The octahedral cages of **1-7** ((a) for **1**, (b) for **2**, (c) for **3** and **7**, (d) for **4** and **6**, (e) for **5**) built by metal clusters and aobtc ligands, and  $[M(bpy)_2]^{2+}$  groups and diprotonate N-donor groups in the cages are highlighted by cerulean lines.

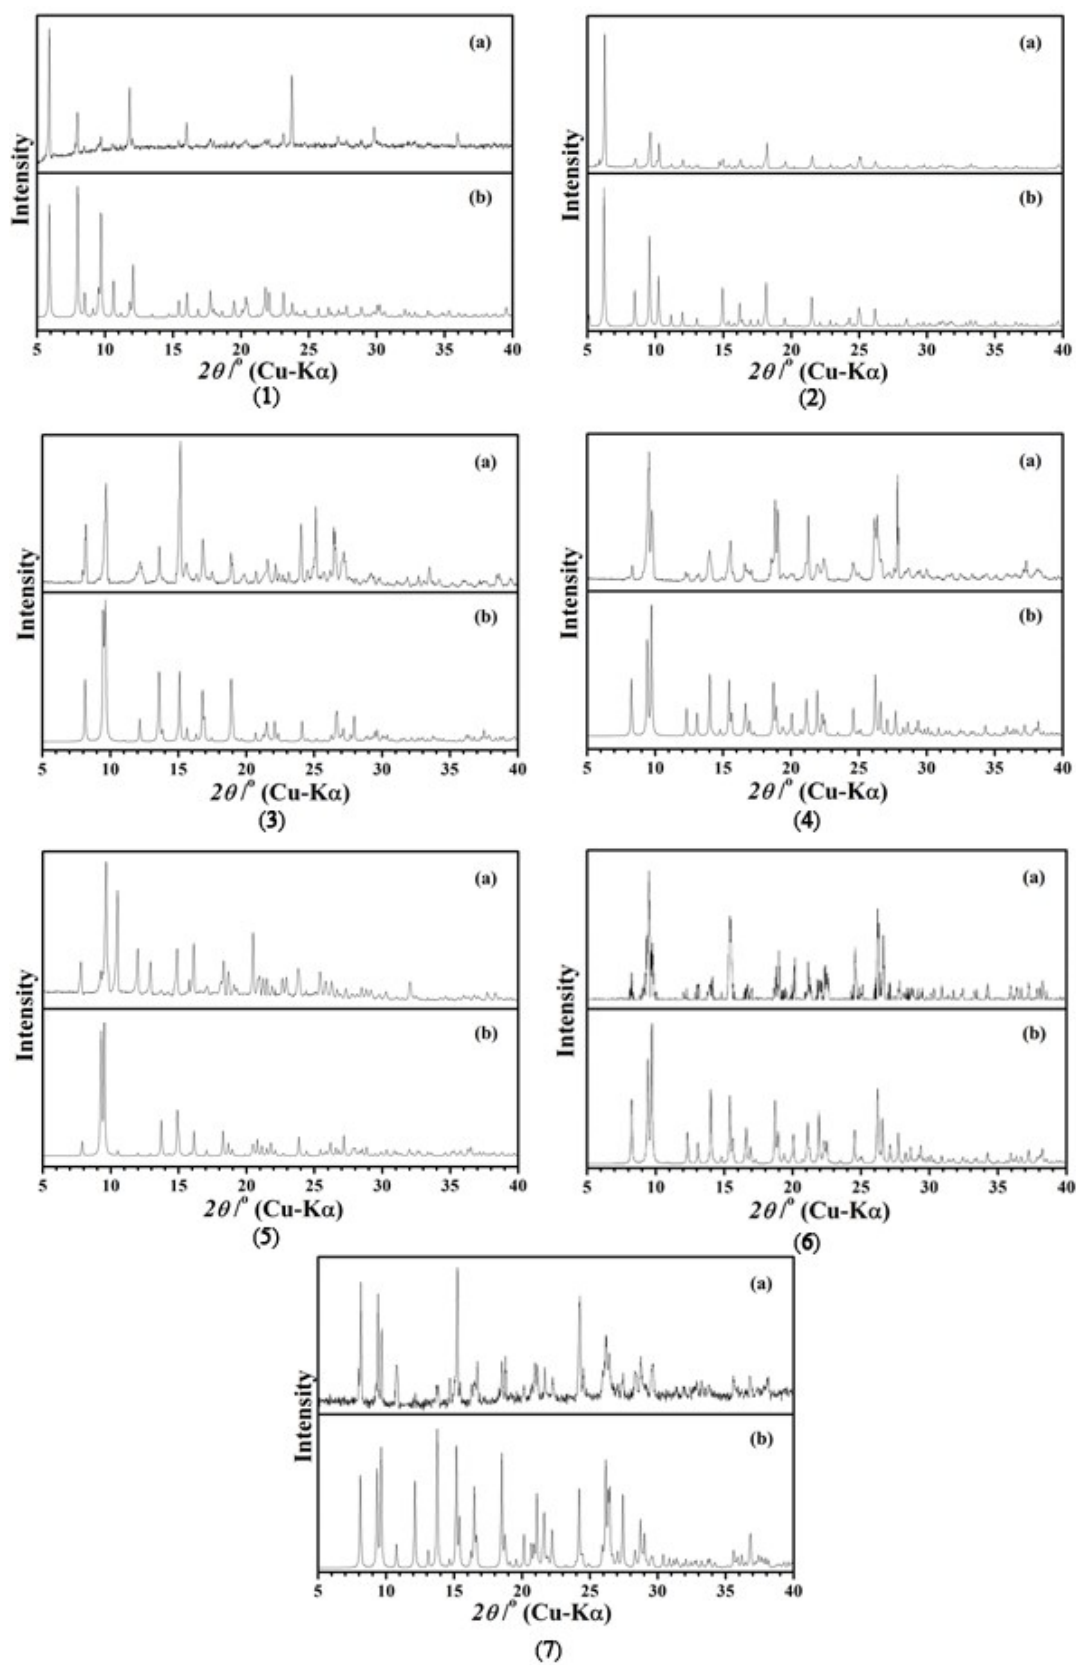

**Fig. S5** The PXRD patterns for 1-7 ((a): as-synthesized samples, (b): simulated one based on the single-crystal structure).

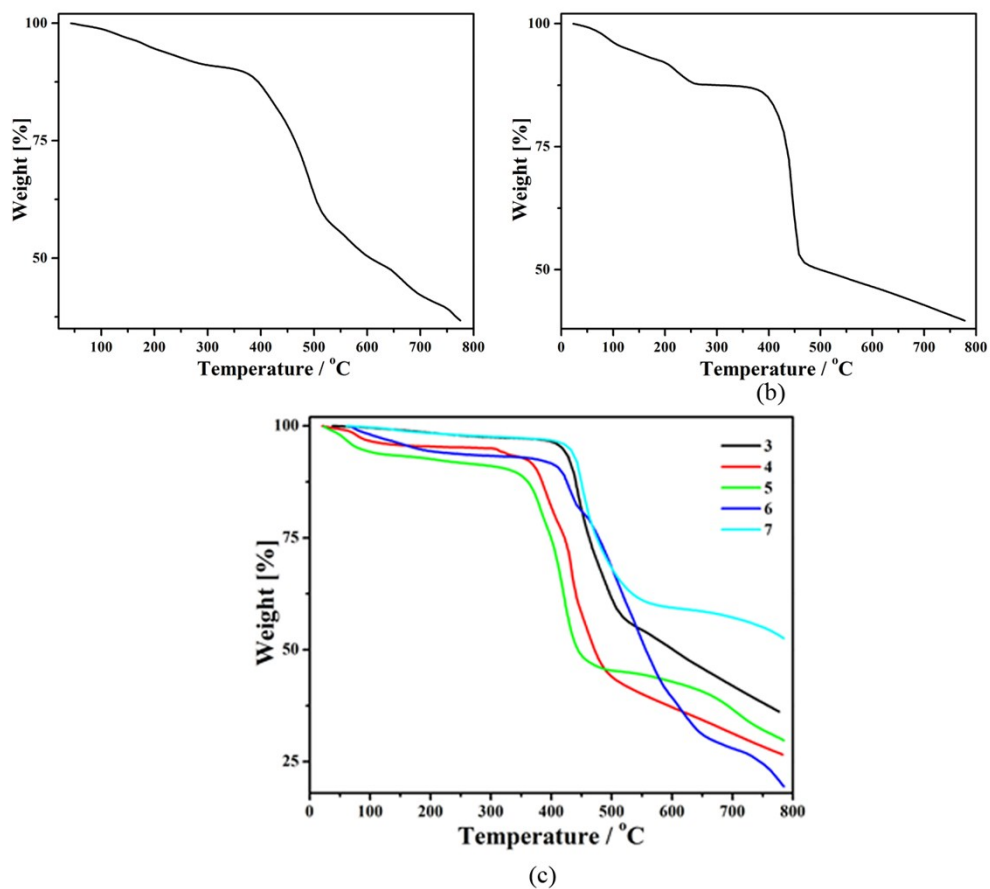

**Fig. S6** The TG curves of compounds 1(a), 2(b), and 3-7(c).

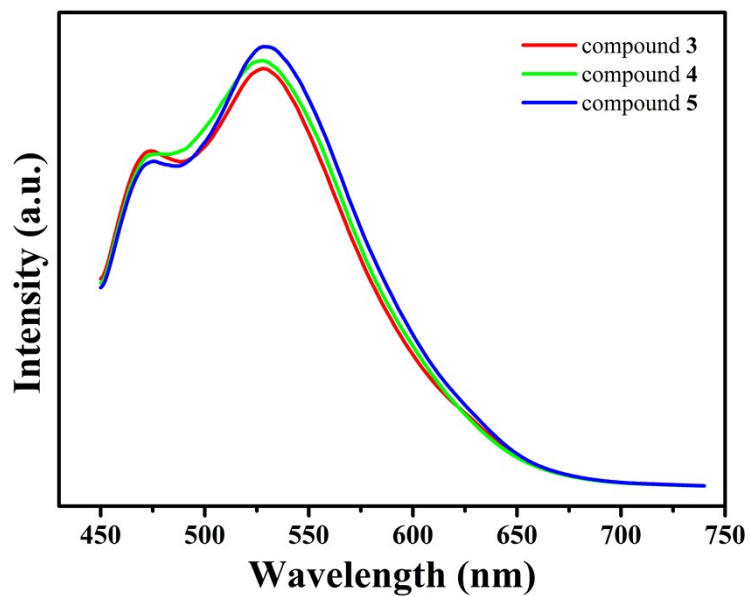

**Fig. S7.** Solid-state emission spectra of 3-5 at room temperature.

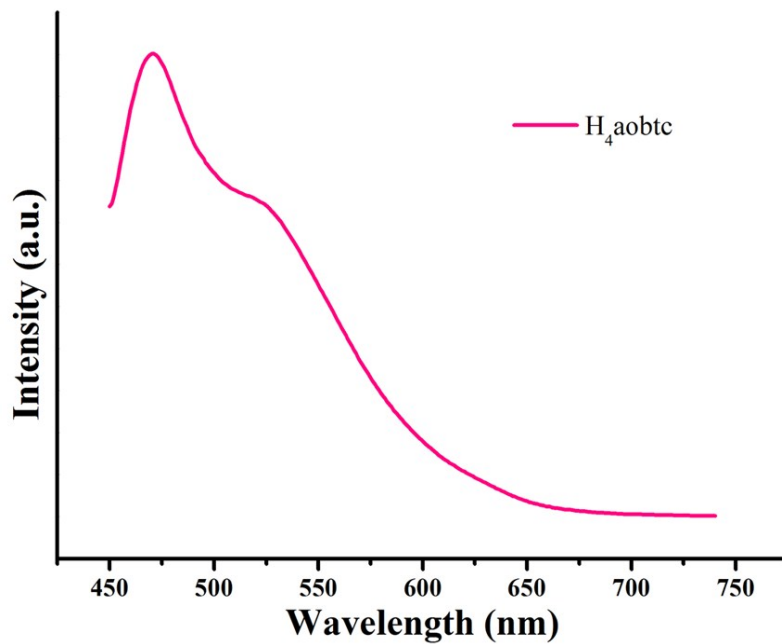

Fig. S8. Solid-state emission spectra of H<sub>4</sub>aobtc ligand at room temperature.

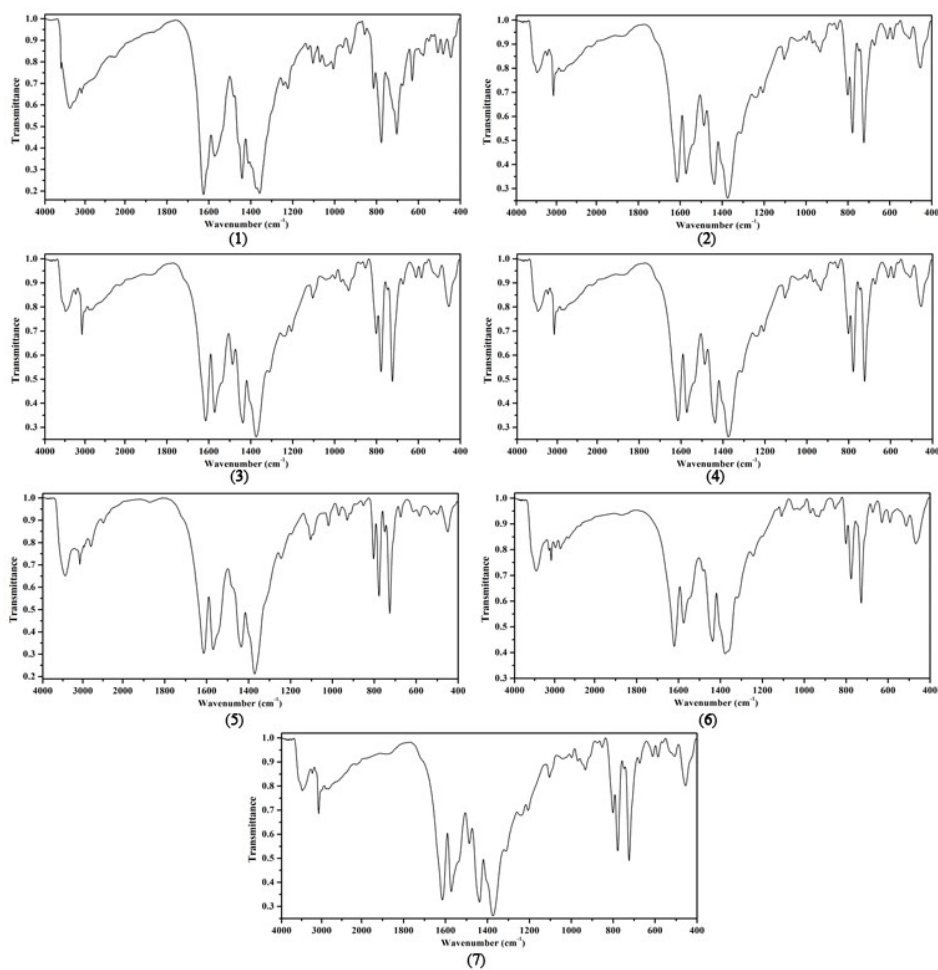

Fig. S9 The IR spectrum of compounds 1-7.

## Topological Analysis by TOPOS 4.0.

Compound 1: (Sc1:14-connected  $[\text{Co}_6(\mu_3\text{-OH})_2(\mu_2\text{-OH}_2)_2(\text{COO})_{12}]^{2-}$  cluster; V1, Cr1: two kinds of 4-connected aobtc ligands)

### Topology for Sc1

#### The links to Atom Sc1

|     |         |         |         |            |         |   |
|-----|---------|---------|---------|------------|---------|---|
| Cr1 | 0.0000  | 0.5000  | 0.0000  | (0 0 0)    | 8.282A  | 1 |
| Cr1 | 1.0000  | 0.5000  | 1.0000  | (1 0 1)    | 8.282A  | 1 |
| V1  | -0.2667 | 0.1983  | 0.0321  | (0 1 1)    | 8.500A  | 1 |
| V1  | 1.2667  | 0.8017  | 0.9679  | (1 0 0)    | 8.500A  | 1 |
| V1  | 0.7333  | 0.1983  | 0.0321  | (1 1 1)    | 9.327A  | 1 |
| V1  | 0.2667  | 0.8017  | 0.9679  | (0 0 0)    | 9.327A  | 1 |
| V1  | 0.7333  | 0.1983  | 1.0321  | (1 1 2)    | 9.894A  | 1 |
| V1  | 0.2667  | 0.8017  | -0.0321 | (0 0 -1)   | 9.894A  | 1 |
| V1  | 0.7333  | 1.1983  | 1.0321  | (1 2 2)    | 10.245A | 1 |
| V1  | 0.2667  | -0.1983 | -0.0321 | (0 -1 -1)  | 10.245A | 1 |
| Cr1 | 0.0000  | 0.5000  | 1.0000  | (0 0 1)    | 11.005A | 1 |
| Cr1 | 1.0000  | 0.5000  | 0.0000  | (1 0 0)    | 11.005A | 1 |
| Sc1 | 1.5000  | 1.5000  | 2.5000  | (1 1 2)    | 30.225A | 1 |
| Sc1 | -0.5000 | -0.5000 | -1.5000 | (-1 -1 -2) | 30.225A | 1 |

### Topology for V1

#### The links to Atom V1

|     |         |        |        |          |         |   |
|-----|---------|--------|--------|----------|---------|---|
| Sc1 | -0.5000 | 0.5000 | 0.5000 | (-1 0 0) | 8.500A  | 1 |
| Sc1 | 0.5000  | 0.5000 | 0.5000 | (0 0 0)  | 9.327A  | 1 |
| Sc1 | 0.5000  | 0.5000 | 1.5000 | (0 0 1)  | 9.894A  | 1 |
| Sc1 | 0.5000  | 1.5000 | 1.5000 | (0 1 1)  | 10.245A | 1 |

### Topology for Cr1

#### The links to Atom Cr1

|     |         |        |         |           |         |   |
|-----|---------|--------|---------|-----------|---------|---|
| Sc1 | -0.5000 | 0.5000 | -0.5000 | (-1 0 -1) | 8.282A  | 1 |
| Sc1 | 0.5000  | 0.5000 | 0.5000  | (0 0 0)   | 8.282A  | 1 |
| Sc1 | 0.5000  | 0.5000 | -0.5000 | (0 0 -1)  | 11.005A | 1 |
| Sc1 | -0.5000 | 0.5000 | 0.5000  | (-1 0 0)  | 11.005A | 1 |

### Coordination sequences

|      |    |    |     |     |     |      |      |      |      |      |
|------|----|----|-----|-----|-----|------|------|------|------|------|
| Sc1: | 1  | 2  | 3   | 4   | 5   | 6    | 7    | 8    | 9    | 10   |
| Num  | 14 | 40 | 120 | 182 | 346 | 426  | 686  | 772  | 1140 | 1220 |
| Cum  | 15 | 55 | 175 | 357 | 703 | 1129 | 1815 | 2587 | 3727 | 4947 |
| V1:  | 1  | 2  | 3   | 4   | 5   | 6    | 7    | 8    | 9    | 10   |
| Num  | 4  | 42 | 89  | 211 | 282 | 494  | 577  | 891  | 974  | 1402 |



### The links to Atom V1

|     |        |        |        |          |        |   |
|-----|--------|--------|--------|----------|--------|---|
| Cr1 | 0.7500 | 1.0000 | 0.8747 | (-1 0 1) | 8.564A | 1 |
| Cr1 | 0.2500 | 0.5000 | 0.8747 | (1 1 1)  | 8.564A | 1 |
| Cr1 | 0.2500 | 1.0000 | 1.1253 | (0 1 1)  | 9.112A | 1 |
| Cr1 | 0.7500 | 0.5000 | 1.1253 | (0 0 1)  | 9.112A | 1 |

### Topology for Cr1

#### The links to Atom Cr1

|     |        |         |         |          |         |   |
|-----|--------|---------|---------|----------|---------|---|
| Ti1 | 0.6221 | 0.7500  | 0.2500  | (1 1 0)  | 8.441A  | 1 |
| Ti1 | 0.8779 | 0.2500  | 0.2500  | (0 0 0)  | 8.441A  | 1 |
| V1  | 0.5000 | 0.2500  | 0.0162  | (1 1 1)  | 8.564A  | 1 |
| V1  | 1.0000 | 0.7500  | 0.0162  | (0 0 1)  | 8.564A  | 1 |
| V1  | 0.5000 | 0.7500  | -0.0162 | (0 0 -1) | 9.112A  | 1 |
| V1  | 1.0000 | 0.2500  | -0.0162 | (1 1 -1) | 9.112A  | 1 |
| Ti1 | 0.3779 | 0.7500  | 0.2500  | (-1 1 0) | 9.401A  | 1 |
| Ti1 | 1.1221 | 0.2500  | 0.2500  | (2 0 0)  | 9.401A  | 1 |
| Cr1 | 0.7500 | 1.5000  | 0.1253  | (0 1 0)  | 28.393A | 1 |
| Cr1 | 0.7500 | -0.5000 | 0.1253  | (0 -1 0) | 28.393A | 1 |

### Coordination sequences

|      |   |    |     |     |     |     |      |      |      |      |
|------|---|----|-----|-----|-----|-----|------|------|------|------|
| Ti1: | 1 | 2  | 3   | 4   | 5   | 6   | 7    | 8    | 9    | 10   |
| Num  | 4 | 31 | 64  | 128 | 176 | 290 | 344  | 516  | 568  | 802  |
| Cum  | 5 | 36 | 100 | 228 | 404 | 694 | 1038 | 1554 | 2122 | 2924 |

|     |   |    |    |     |     |     |      |      |      |      |
|-----|---|----|----|-----|-----|-----|------|------|------|------|
| V1: | 1 | 2  | 3  | 4   | 5   | 6   | 7    | 8    | 9    | 10   |
| Num | 4 | 30 | 64 | 128 | 176 | 288 | 344  | 512  | 568  | 800  |
| Cum | 5 | 35 | 99 | 227 | 403 | 691 | 1035 | 1547 | 2115 | 2915 |

|      |    |    |     |     |     |     |      |      |      |      |
|------|----|----|-----|-----|-----|-----|------|------|------|------|
| Cr1: | 1  | 2  | 3   | 4   | 5   | 6   | 7    | 8    | 9    | 10   |
| Num  | 10 | 30 | 74  | 114 | 202 | 254 | 394  | 450  | 650  | 702  |
| Cum  | 11 | 41 | 115 | 229 | 431 | 685 | 1079 | 1529 | 2179 | 2881 |

### Vertex symbols for selected sublattice

-----

Ti1 Point (Schlafli) symbol: {4<sup>6</sup>}

Extended point symbol:[4.4.4.4.4(2).4(2)]

-----

V1 Point (Schlafli) symbol: {4<sup>5</sup>.5}



Extended point symbol:[4.4.4.4.4(2).5(6)]

-----  
Cr1 Point (Schlafli) symbol: {4<sup>10</sup>.5<sup>18</sup>.6<sup>12</sup>.7<sup>5</sup>}

Extended point symbol:[4.4.4.4.4.4.4.4.4(3).4(3).5.5.5.5.5.5.5.5.5(3).5(3).5(3).5(3).5(3).5(5).5(5).6(4).6(4).6(4).6(4).6(5).6(5).6(7).6(7).6(7).6(7).6(7).6(7).7(8).7(8).7(8).7(8).7(14)]

-----  
Point (Schlafli) symbol for net: {4<sup>10</sup>.5<sup>18</sup>.6<sup>12</sup>.7<sup>5</sup>} {4<sup>5</sup>.5} {4<sup>6</sup>}

4,10-*c* net with stoichiometry (4-*c*)<sub>2</sub>(10-*c*); 3-nodal net

Compound **3**: (Ti1:8-connected [Zn<sub>3</sub>(COO)<sub>8</sub>]<sup>2-</sup> cluster; Sc1: 4-connected aobtc ligand)

Topology for Sc1

The links to Atom Sc1

|     |        |         |         |           |         |   |
|-----|--------|---------|---------|-----------|---------|---|
| Ti1 | 0.0000 | 0.5000  | 0.5000  | (0 0 0)   | 5.154A  | 1 |
| Ti1 | 1.0000 | 0.5000  | 0.5000  | (1 0 0)   | 7.024A  | 1 |
| Ti1 | 0.0000 | 0.5000  | -0.5000 | (0 0 -1)  | 8.453A  | 1 |
| Ti1 | 0.0000 | -0.5000 | -0.5000 | (0 -1 -1) | 10.644A | 1 |

Topology for Ti1

The links to Atom Ti1

|     |         |         |         |          |         |   |
|-----|---------|---------|---------|----------|---------|---|
| Sc1 | -0.3128 | 0.4661  | 0.7865  | (0 1 1)  | 5.154A  | 1 |
| Sc1 | 0.3128  | 0.5339  | 0.2135  | (0 0 0)  | 5.154A  | 1 |
| Sc1 | 0.6872  | 0.4661  | 0.7865  | (1 1 1)  | 7.024A  | 1 |
| Sc1 | -0.6872 | 0.5339  | 0.2135  | (-1 0 0) | 7.024A  | 1 |
| Sc1 | -0.3128 | 0.4661  | -0.2135 | (0 1 0)  | 8.453A  | 1 |
| Sc1 | 0.3128  | 0.5339  | 1.2135  | (0 0 1)  | 8.453A  | 1 |
| Sc1 | -0.3128 | -0.5339 | -0.2135 | (0 0 0)  | 10.644A | 1 |
| Sc1 | 0.3128  | 1.5339  | 1.2135  | (0 1 1)  | 10.644A | 1 |

Coordination sequences

|      |   |    |    |     |     |     |     |     |      |      |
|------|---|----|----|-----|-----|-----|-----|-----|------|------|
| Sc1: | 1 | 2  | 3  | 4   | 5   | 6   | 7   | 8   | 9    | 10   |
| Num  | 4 | 22 | 24 | 82  | 64  | 182 | 124 | 322 | 204  | 502  |
| Cum  | 5 | 27 | 51 | 133 | 197 | 379 | 503 | 825 | 1029 | 1531 |

|      |   |    |    |    |     |    |     |     |     |     |
|------|---|----|----|----|-----|----|-----|-----|-----|-----|
| Ti1: | 1 | 2  | 3  | 4  | 5   | 6  | 7   | 8   | 9   | 10  |
| Num  | 8 | 12 | 48 | 42 | 128 | 92 | 248 | 162 | 408 | 252 |

Vertex symbols for selected sublattice

-----

Sc1 Point (Schlafli) symbol: {4<sup>6</sup>}

Extended point symbol:[4.4.4.4.4.4]

-----

Ti1 Point (Schlafli) symbol: {4<sup>12</sup>.6<sup>12</sup>.8<sup>4</sup>}

Extended point symbol:[4.4.4.4.4.4.4.4.4.4.4.4.6(4).6(4).6(4).6(4).6(4).6(4).6(4).

6(4).6(4).6(4).6(4).8(24).8(24).8(24).8(24)]

-----

Point (Schlafli) symbol for net: {4<sup>12</sup>.6<sup>12</sup>.8<sup>4</sup>} {4<sup>6</sup>}<sub>2</sub>

4,8-*c* net with stoichiometry (4-*c*)<sub>2</sub>(8-*c*); 2-nodal net

Topological type: flu/fluorite; sqc169 (topos&RCSR.ttd) {4<sup>12</sup>.6<sup>12</sup>.8<sup>4</sup>} {4<sup>6</sup>}<sub>2</sub> - VS [4.4.

4.4.4.4][4.4.4.4.4.4.4.4.4.4.4.4.6(2).6(2).6(2).6(2).6(2).6(2).6(2).6(2).6(2).6(2).6

(2).\*.\*.\*.\*
